# Supplementary material for: Adsorption of toxic gases on borophene: surface deformation links to chemisorptions
Source: Royal Society of Chemistry journal article supplement (doi:10.1039/d1ra02738g), 2021-01-01
Supplement: d1ra02738g1.pdf [file d1ra02738g1.pdf]

## Supplementary Material

# Adsorption of toxic gases on borophene: surface deformation links to chemisorptions

*Luong Thi Ta<sup>1,2,3</sup>, Ikutaro Hamada<sup>1,4</sup>, Yoshitada Morikawa<sup>\*1,4,5</sup> and Van An Dinh<sup>\*2,6</sup>*

<sup>1</sup> Department of Precision Engineering, Graduate School of Engineering, Osaka University, 2-1, Yamadaoka, Suita, Osaka 565-0871, Japan.

<sup>2</sup> Nanotechnology Program, VNU Vietnam Japan University, Luu Huu Phuoc Str., My Dinh I, Nam Tu Liem, Hanoi, 100000, Vietnam.

<sup>3</sup> Department of Chemistry, Institute of Environment, Vietnam Maritime University, Le Chan, Haiphong, 18000, Vietnam.

<sup>4</sup> Elements Strategy Initiative for Catalysts and Batteries (ESICB), Kyoto University, Goryo-Ohara, Nishikyo-ku, Kyoto 615-8245, Japan.

<sup>5</sup> Research Center for Ultra-Precision Science and Technology, Graduate School of Engineering, Osaka University, 2-1 Yamadaoka, Suita, Osaka, 565-0871, Japan.

<sup>6</sup> Center for Atomic and Molecular Technologies, Graduate School of Engineering, Osaka University, 2-1 Yamadaoka, Suita, Osaka, 565-0871, Japan.

(\*) Corresponding authors: [morikawa@prec.eng.osaka-u.ac.jp](mailto:morikawa@prec.eng.osaka-u.ac.jp) (Y. Morikawa); [dv.an@vju.ac.vn](mailto:dv.an@vju.ac.vn) (V. A. Dinh)

# Contents

|                                                                                                      |    |
|------------------------------------------------------------------------------------------------------|----|
| <b>S1. Interaction energy as a function of spatial coordinate</b> .....                              | 3  |
| - Interaction energy vs. $xy$ coordinate (FIG. S1)                                                   |    |
| - Interaction energy vs. $z$ coordinate (FIG. S2)                                                    |    |
| <b>S2. Gas-phase computational details</b> .....                                                     | 5  |
| - Gas profiles in isolated and adsorption states (Table S1)                                          |    |
| - Electronic structure and molecular-orbital representations of the molecules in gas phase (FIG. S3) |    |
| <b>S3. Employment of a later generation of non-local vdW-DF: vdW-DF3</b> .....                       | 7  |
| - Adsorption properties obtained using vdW-DF3-opt1 and vdW-DF3-opt2 (Table S2)                      |    |
| <b>S4. Comparison of borophene to other 2D-materials in adsorption energies</b> .....                | 8  |
| - Adsorption energies of toxic gases on borophene and other 2D materials (Table S3)                  |    |
| <b>S5. Vibration modes of molecules in the gas phase and adsorption state</b> .....                  | 9  |
| - Gas phase (FIG. S4)                                                                                |    |
| - Adsorption state (FIG. S5)                                                                         |    |
| <b>S6. Explanation of softening vibrational modes</b> .....                                          | 11 |
| - COOP analysis of C-O bond (FIG. S6)                                                                |    |
| - COOP analysis of N-O bonds in $\text{NO}_2$ (FIG. S7)                                              |    |
| <b>S7. Electronic analyses of NO and <math>\text{CO}_2</math> interacting with borophene</b> .....   | 12 |
| - Electronic structure of NO-borophene (FIG. S8, S9)                                                 |    |
| - Electronic structure of $\text{CO}_2$ -borophene (FIG. S10, S11)                                   |    |

## S1. Interaction energy as a function of spatial coordinate

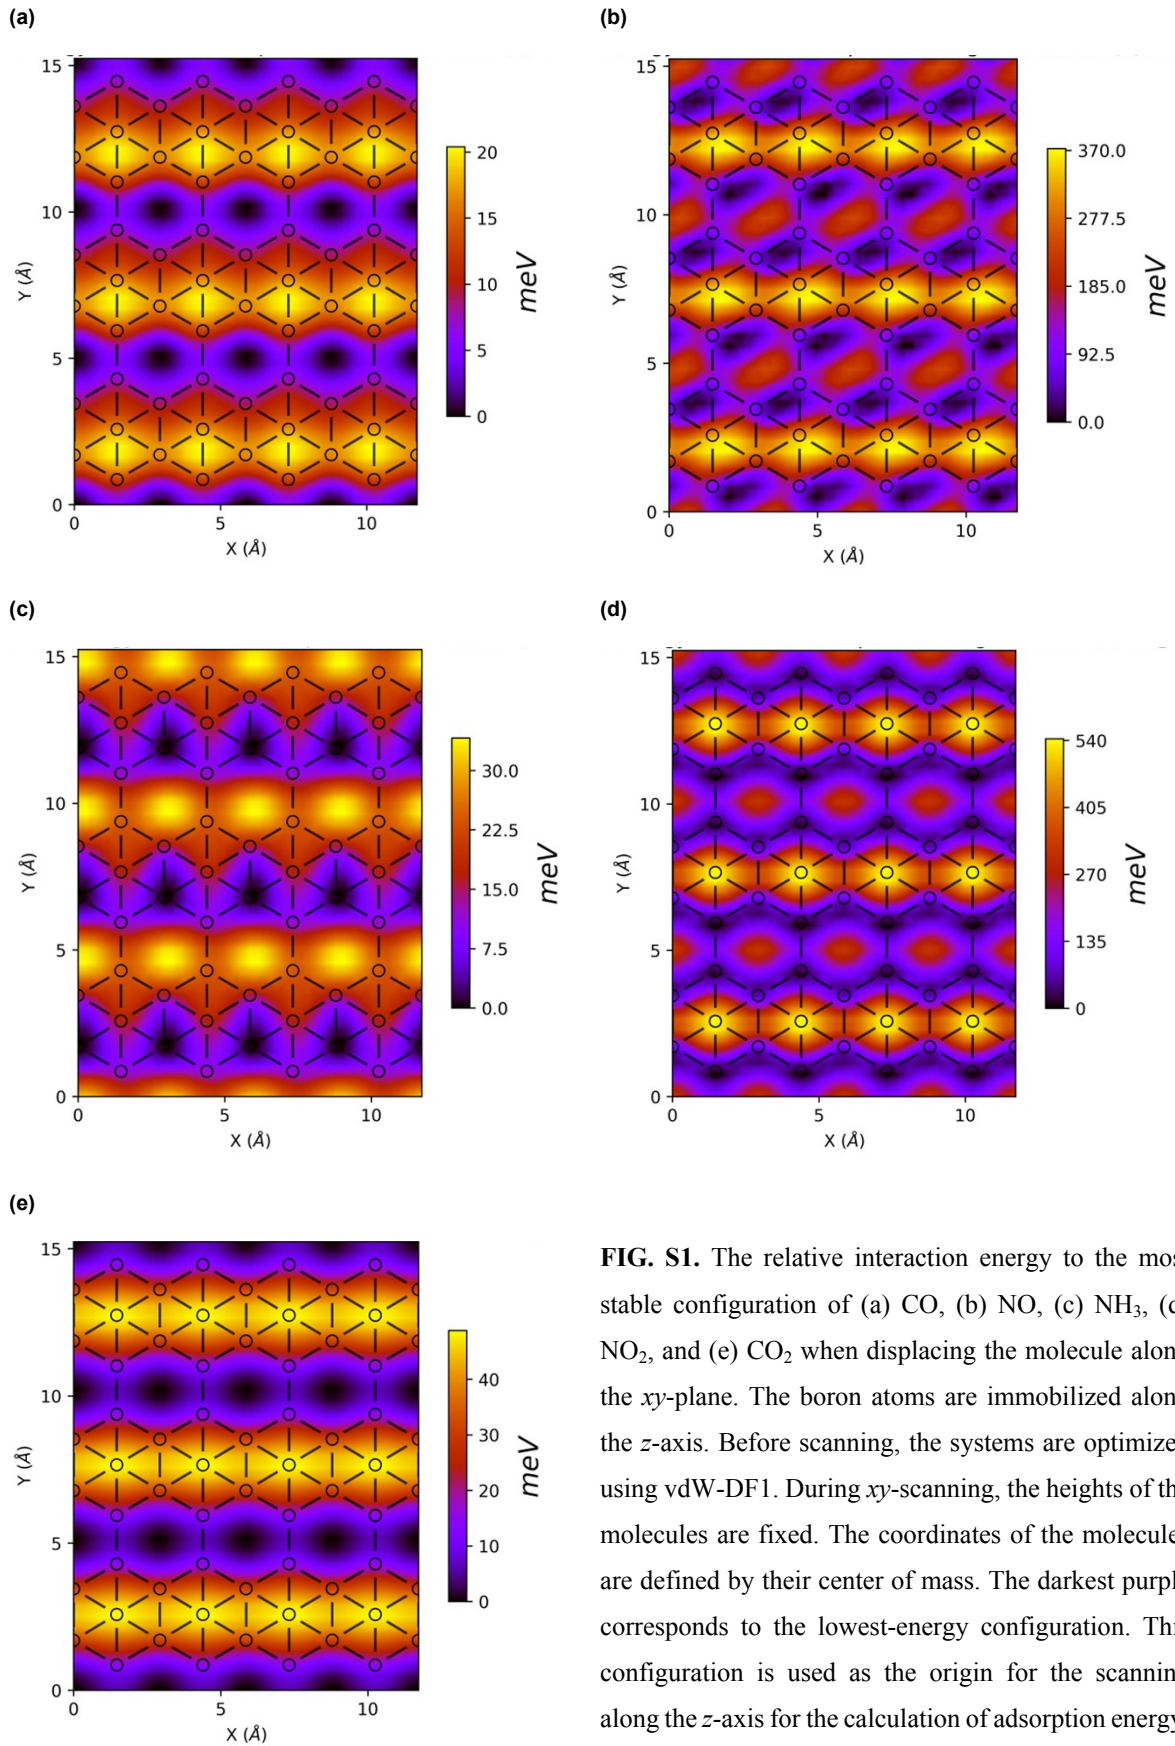

**FIG. S1.** The relative interaction energy to the most stable configuration of (a) CO, (b) NO, (c) NH<sub>3</sub>, (d) NO<sub>2</sub>, and (e) CO<sub>2</sub> when displacing the molecule along the  $xy$ -plane. The boron atoms are immobilized along the  $z$ -axis. Before scanning, the systems are optimized using vdW-DF1. During  $xy$ -scanning, the heights of the molecules are fixed. The coordinates of the molecules are defined by their center of mass. The darkest purple corresponds to the lowest-energy configuration. This configuration is used as the origin for the scanning along the  $z$ -axis for the calculation of adsorption energy.

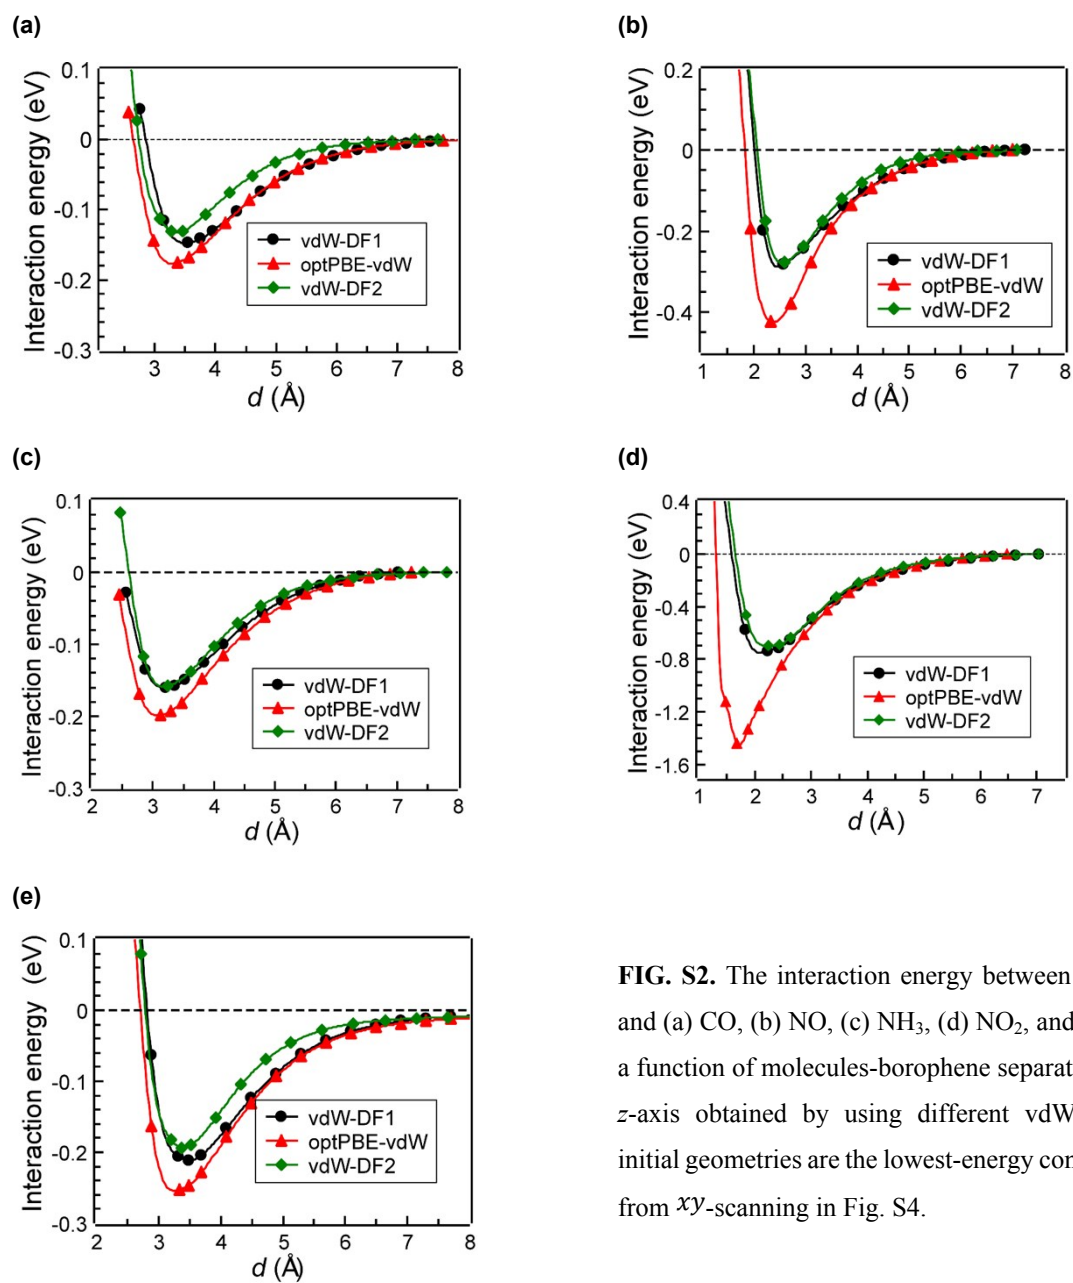

**FIG. S2.** The interaction energy between borophene and (a) CO, (b) NO, (c) NH<sub>3</sub>, (d) NO<sub>2</sub>, and (e) CO<sub>2</sub> as a function of molecules-borophene separation  $d$  along  $z$ -axis obtained by using different vdW-DFs. The initial geometries are the lowest-energy configurations from  $xy$ -scanning in Fig. S4.

## S2. Gas-phase computational details

All calculations of molecules in the gas phase were carried out using the model of a single molecule in a vacuum box. The box has the same size as that in the adsorption systems. The Gamma k-point was used. The exchange-correlation functional optPBE-vdW was employed for the sake of consistency with the adsorption systems. The other parameters were set as presented in the Computational details section.

**Table S1.** Summary gas profiles in isolated and adsorption states

|             | CO        |            | NO        |            | NH <sub>3</sub> |            | NO <sub>2</sub> |                | CO <sub>2</sub> |            |
|-------------|-----------|------------|-----------|------------|-----------------|------------|-----------------|----------------|-----------------|------------|
|             | Gas-phase | Ads. state | Gas-phase | Ads. state | Gas-phase       | Ads. state | Gas-phase       | Ads. state     | Gas-phase       | Ads. state |
| Bond length | 1.14      | 1.16       | 1.170     | 1.186      | 1.021           | 1.028      | 1.216           | 1.363<br>1.213 | 1.177           | 1.178      |
| Bond angle  | -         | -          | -         | -          | 106.6°          | 108°       | 133.4°          | 120.7°         | 180°            | 180°       |

The unit of bond length is angstrom

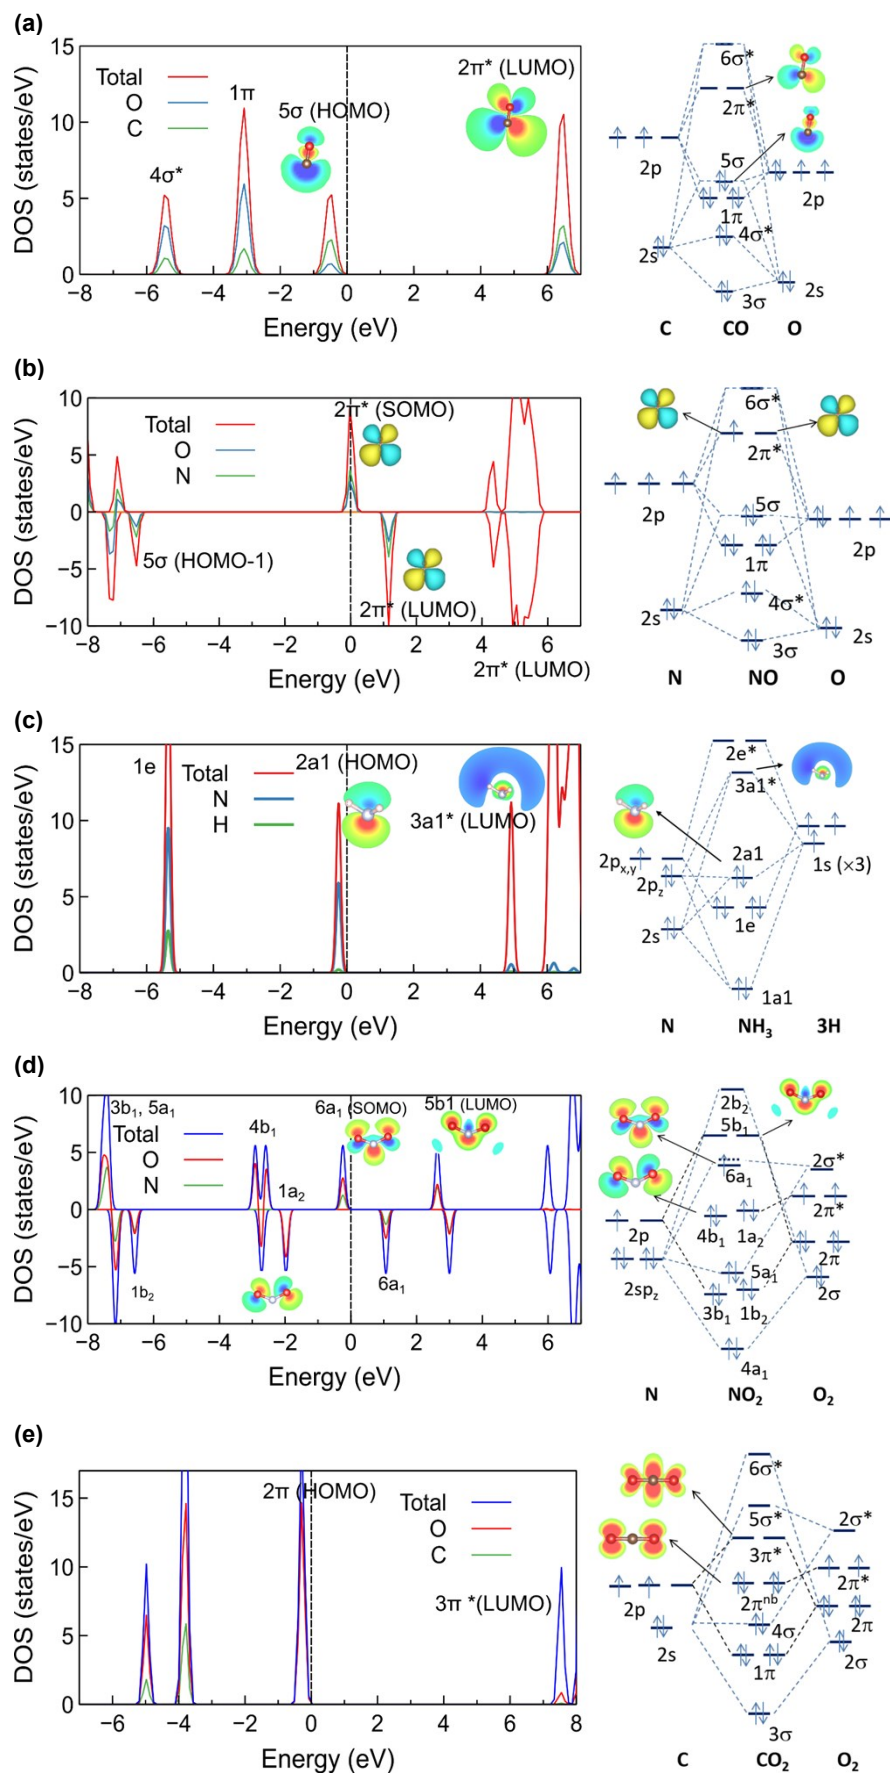

**FIG. S3.** Electronic structure and molecular orbital diagram of (a) CO, (b) NO, (c) NH<sub>3</sub>, (d) NO<sub>2</sub>, and (e) CO<sub>2</sub> molecule. Insets are spatial distributions of HOMOs and LUMOs.

### S3. Employment of a later generation of non-local vdW-DF: vdW-DF3

**Table S2.** Adsorption energies ( $E_{ad}$ ) and adsorption distances ( $d$ ) of CO<sub>2</sub>, CO, NH<sub>3</sub>, NO, and NO<sub>2</sub> on borophene obtained using two options of vdW-DF3 functional<sup>1</sup> (i.e., vdW-DF3-opt1 and vdW-DF3-opt2). The calculations were performed using PAW method implemented in Quantum Espresso code. The convergence threshold for self-consistent field calculations was set to  $10^{-10}$  Ry/cell. Convergence threshold on forces acting on atoms for the ionic minimization was set to  $5 \times 10^{-4}$  Ry/borh. The kinetic-energy cutoff was set to 40 Ry. The structure and k-point sampling settings are the same as described in the Methodology section.

| Molecules       | Adsorption properties | vdW-DF3-opt1 | vdW-DF3-opt2 |
|-----------------|-----------------------|--------------|--------------|
| CO <sub>2</sub> | $E_{ad}$ (eV)         | -0.18        | -0.19        |
|                 | $d$ (Å)               | 3.21         | 3.25         |
| CO              | $E_{ad}$ (eV)         | -1.17        | -1.08        |
|                 | $d$ (Å)               | 1.48         | 1.49         |
| NH <sub>3</sub> | $E_{ad}$ (eV)         | -1.11        | -1.03        |
|                 | $d$ (Å)               | 1.62         | 1.63         |
| NO              | $E_{ad}$ (eV)         | -1.01        | -0.91        |
|                 | $d$ (Å)               | 1.38         | 1.38         |
| NO <sub>2</sub> | $E_{ad}$ (eV)         | -1.95        | -1.80        |
|                 | $d$ (Å)               | 1.56         | 1.57         |

#### S4. Comparison of borophene to other 2D-materials in adsorption energies

**Table S3.** Adsorption energies (eV) of CO<sub>2</sub>, CO, NH<sub>3</sub>, NO, and NO<sub>2</sub> on 2D materials calculated by different vdW functionals

|                 | vdW approx. | borophene |                    | graphene           | MoS <sub>2</sub> | WS <sub>2</sub> | german-ene         | phospho-rene |
|-----------------|-------------|-----------|--------------------|--------------------|------------------|-----------------|--------------------|--------------|
|                 |             | This work | 2,3                | 4,5                | 6                | 7               | 8                  | 9*           |
| CO <sub>2</sub> | vdW-DF1     | -0.21     | --                 | -0.38 <sup>c</sup> | -0.21            | --              | --                 | --           |
|                 | optPBE-vdW  | -0.27     | --                 | --                 | -0.25            | --              | --                 | --           |
|                 | vdW-DF2     | -0.19     | --                 | --                 | --               | --              | --                 | --           |
|                 | rev-vdW-DF2 | -0.32     | --                 | -0.27 <sup>c</sup> | --               | --              | --                 | --           |
|                 | PBE-D2      | --        | -0.18 <sup>a</sup> | --                 | -0.14            | --              | -0.10              | --           |
| CO              | vdW-DF1     | -0.64     | --                 | --                 | -0.14            | -0.21           | --                 | --           |
|                 | optPBE-vdW  | -0.86     | --                 | --                 | -0.16            | --              | --                 | -0.31        |
|                 | vdW-DF2     | -0.49     | --                 | -0.11 <sup>d</sup> | --               | --              | --                 | --           |
|                 | rev-vdW-DF2 | -1.18     | --                 | --                 | --               | --              | --                 | --           |
|                 | PBE-D2      | --        | -1.19 <sup>b</sup> | --                 | -0.07            | -0.11           | -0.16              | --           |
| NH <sub>3</sub> | vdW-DF1     | -0.52     | --                 | --                 | -0.13            | --              | --                 | --           |
|                 | optPBE-vdW  | -0.83     | --                 | --                 | -0.18            | --              | --                 | -0.18        |
|                 | vdW-DF2     | -0.41     | --                 | -0.10 <sup>d</sup> | --               | --              | --                 | --           |
|                 | rev-vdW-DF2 | -1.15     | --                 | --                 | --               | --              | --                 | --           |
|                 | PBE-D2      | --        | -1.11 <sup>b</sup> | --                 | -0.13            | --              | -0.44              | --           |
| NO              | vdW-DF1     | -0.39     | --                 | --                 | -0.24            | --              | --                 | --           |
|                 | optPBE-vdW  | -0.72     | --                 | --                 | -0.25            | -0.25           | --                 | -0.32        |
|                 | vdW-DF2     | -0.38     | --                 | --                 | --               | --              | --                 | --           |
|                 | rev-vdW-DF2 | -1.05     | --                 | --                 | --               | --              | --                 | --           |
|                 | PBE-D2      | --        | -0.95 <sup>b</sup> | --                 | -0.15            | -0.13           | -0.51              | --           |
| NO <sub>2</sub> | vdW-DF1     | -1.56     | --                 | --                 | -0.24            | --              | --                 | --           |
|                 | optPBE-vdW  | -1.67     | --                 | --                 | -0.29            | --              | --                 | -0.50        |
|                 | vdW-DF2     | -1.28     | --                 | -0.18 <sup>d</sup> | --               | --              | --                 | --           |
|                 | rev-vdW-DF2 | -1.91     | --                 | --                 | --               | --              | --                 | --           |
|                 | PBE-D2      | --        | -1.80 <sup>b</sup> | --                 | -0.14            | --              | -1.08 <sup>g</sup> | --           |

<sup>a</sup> Ref. 2; <sup>b</sup> Ref. 3; <sup>c</sup> Ref. 4; <sup>d</sup> Ref. 5;

\* In ref<sup>9</sup>, the functional optB88-vdW was used.



### S5. Vibration modes of molecules in the gas phase and adsorption state

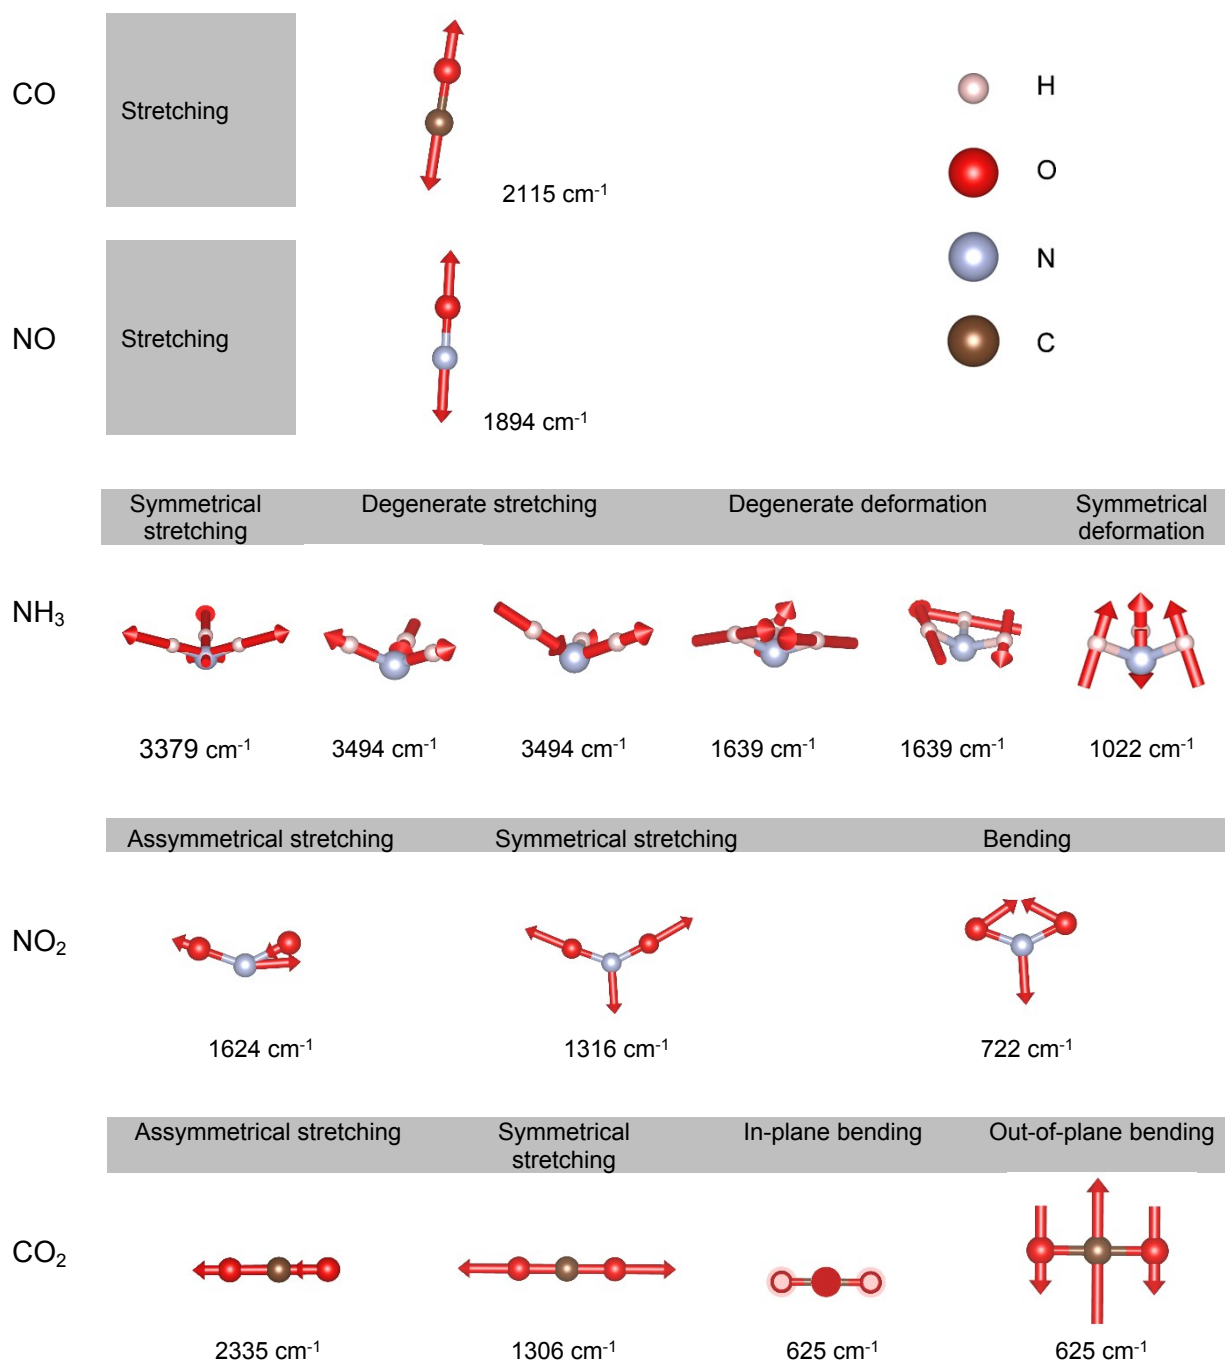

FIG. S4. Vibrational modes of CO, NO, NH<sub>3</sub>, NO<sub>2</sub>, and CO<sub>2</sub> in the gas phase.

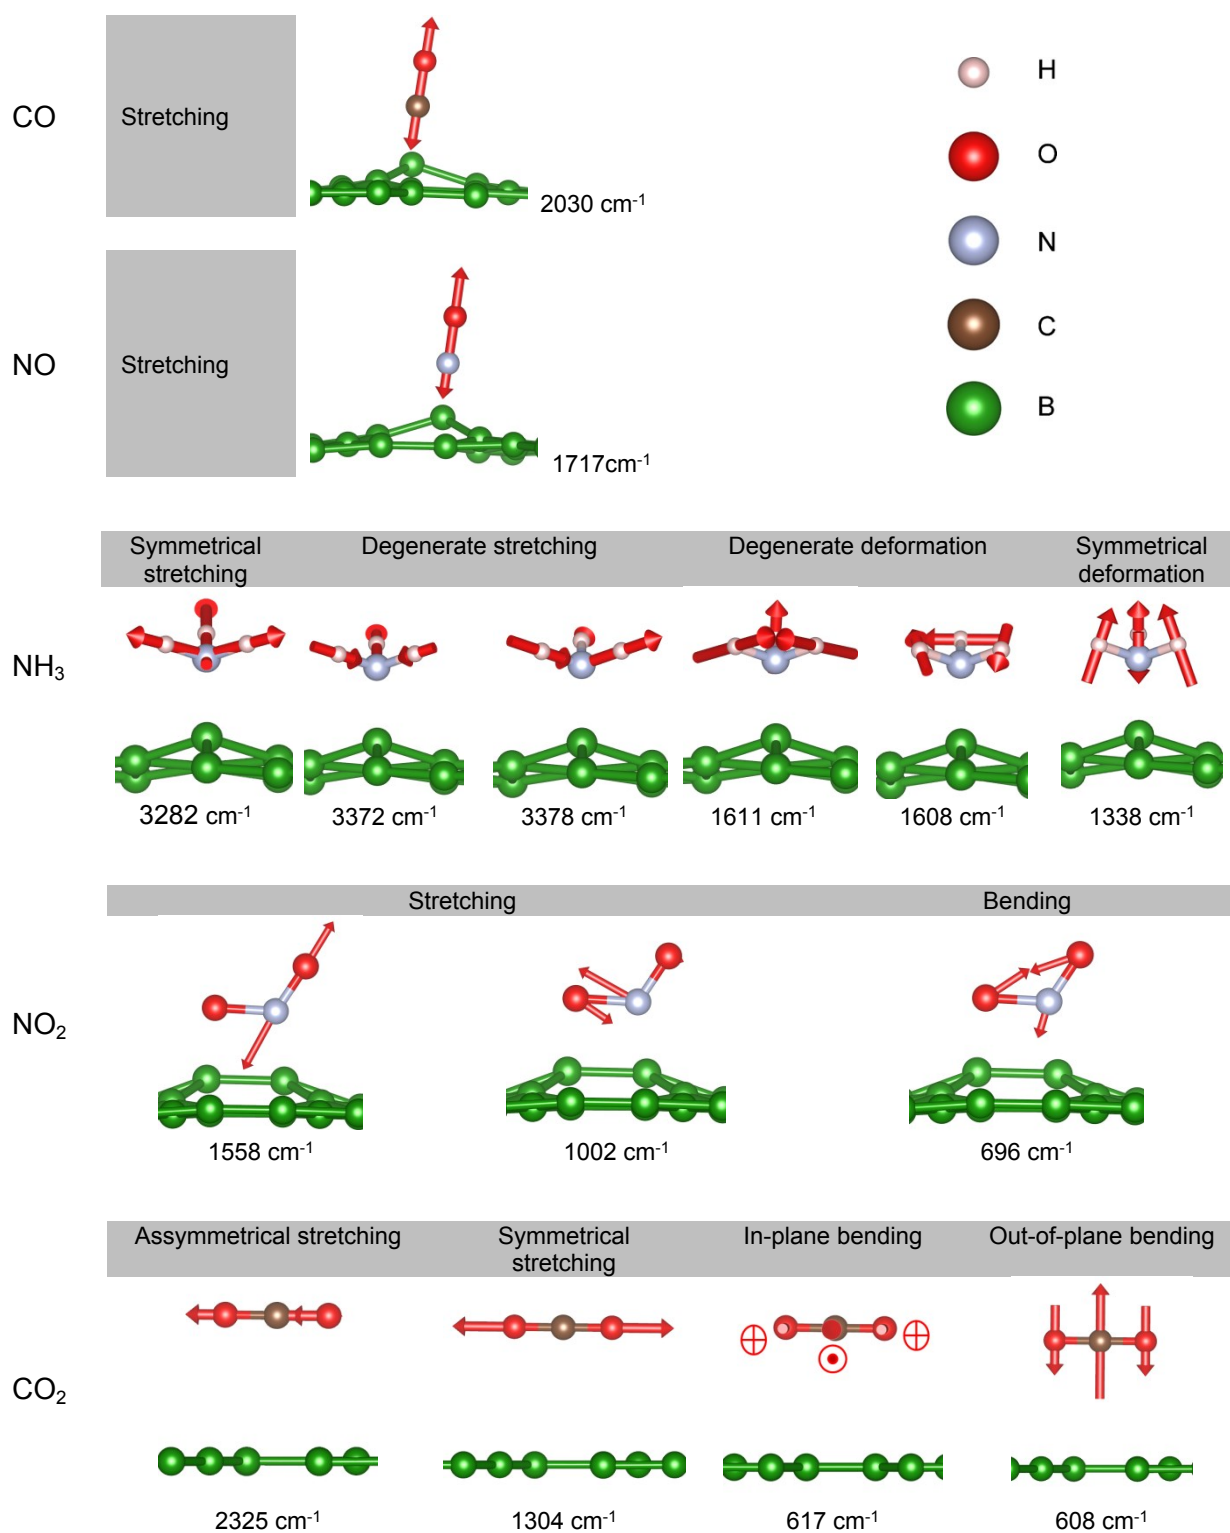

**FIG. S5.** Vibrational modes of CO, NO, NH<sub>3</sub>, NO<sub>2</sub>, and CO<sub>2</sub> in adsorption state.

## S6. Explanation of softening vibrational modes

We investigated the bonding between C and O in the CO molecule after adsorption. The  $5\sigma$  donation and  $2\pi^*$  backdonation induce the weakening of the C–O bond due to the partially filled  $2\pi^*$  with the antibonding character. This is supported by the COOP analysis between AOs of C and O atoms. As seen in Fig. S6, negative COOP develops from  $E_F - 4$  eV, where the antibonding  $2\pi^*$  orbital of CO is partially occupied, leading to weakening of the C–O bond as well as softening of the CO stretching mode (Fig. S4 and S5).

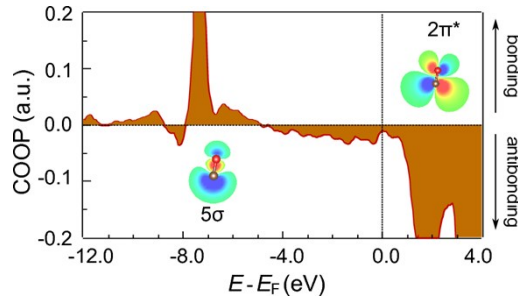

**FIG. S6.** Crystal orbital overlap population (COOP) between atomic orbitals of C and O atoms for CO chemisorbed on borophene. Insets show HOMO ( $5\sigma$ ) and LUMO ( $2\pi^*$ ) of CO.

The calculated vibrational frequencies of gas-phase  $\text{NO}_2$  are 1624, 1316, and 722  $\text{cm}^{-1}$  corresponding to the experimentally measured 1618  $\text{cm}^{-1}$  (asymmetrical stretching), 1318  $\text{cm}^{-1}$  (symmetrical stretching), and 750  $\text{cm}^{-1}$  (bending modes)<sup>10</sup>, respectively. Due to the strong interaction with borophene, these frequencies are significantly red-shifted to 1558, 1002, and 696  $\text{cm}^{-1}$  accordingly (Fig. S4 and S5). The softening of these vibrational modes of gases can be also explained by COOP analysis regarding N–O bonds in the adsorption state, as shown in Fig. S7. It is found that the  $6a_1$  orbital hybridizes with the  $1a_2$ , and the antibonding states are partially occupied in the adsorption state. This leads to the weakening and elongation of the N–O bond, thereby softening the vibrational modes of the  $\text{NO}_2$  molecule.

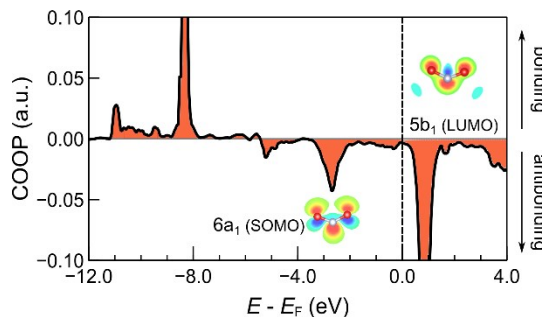

**FIG. S7.** Crystal orbital overlap population (COOP) between atomic orbitals of N and O atoms of  $\text{NO}_2$  in the adsorption state.

## S7. Electronic analyses of NO and CO<sub>2</sub> interacting with borophene

### NO

To gain insight into the interaction between NO and borophene, we calculated COOP and PDOS onto MOs of NO (Fig. S8). Thereby, NO becomes spin unpolarized upon adsorption because of the strong hybridization of its  $2\pi^*$  frontier orbitals and borophene states.

COOP and PDOS reveal that the model of  $5\sigma$  donation and  $2\pi^*$  backdonation is appropriate for NO – borophene chemisorption, similar to CO (Fig. S8a,b). The  $5\sigma$ ,  $1\pi$ , and filled  $2\pi^*$  orbitals contribute to the bonding states, but the contribution of  $2\pi^*$  in this case, is greater. Note that both  $5\sigma$  and  $2\pi^*$  orbitals are significantly delocalized. The  $5\sigma$  states consecutively distribute from ca.  $-10$  eV to more than  $+4$  eV with respect to  $E_F$ . Similarly,  $2\pi^*$  states distribute ranging from  $E_F - 9$  eV to  $E_F + 4$  eV. The great delocalization implies that these orbitals strongly interact with the surface. Considering the intermolecular B – NO bond (Fig. S8c), we found that bonding between NO and B are attributed mostly to  $1\pi - 2p_{xy}$ , and  $2\pi^* - 2p_{xy}$  interactions.

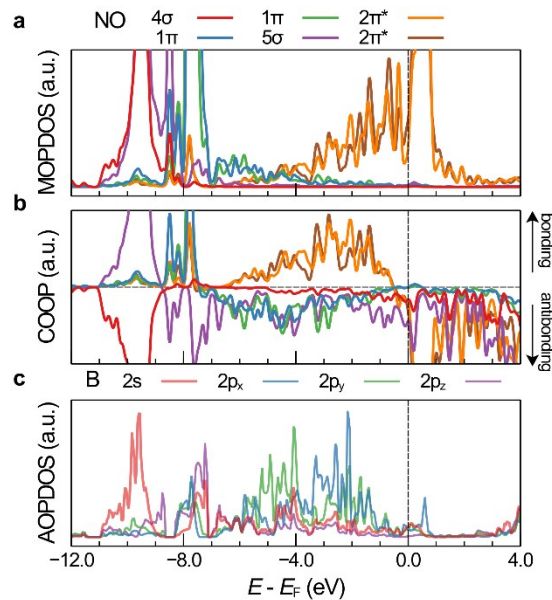

**FIG. S8.** (a) Molecular-orbital projected density of states (MOPDOS) of NO on borophene. (b) Crystal orbital overlap population (COOP) between NO and borophene. (c) Atomic-orbital projected density of states (AOPDOS) of the nearest neighbor B atom to NO.

The calculated charge density difference is shown in Fig. S9. There is charge accumulation corresponding to the backdonation to  $2\pi^*$  orbital and to the bond formation between B and O. Meanwhile the charge depletion is owing to the donation of  $5\sigma$  orbital. This charge rearrangement is similar to that in the CO/borophene system.

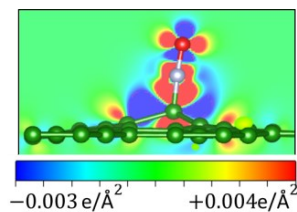

**FIG. S9.** Charge density difference induced by the adsorption of NO on borophene.

## CO<sub>2</sub>

By inspecting the electronic structure shown in Fig. S10, we found that CO<sub>2</sub> does not experience a significant change in its electronic structure; all peaks remain localized at the same positions. However, the  $3\pi^*$  orbital (LUMO) is partially occupied. This is reflected in the charge density difference (Fig. S11), in which the electron accumulation can be seen in the vicinity of O.

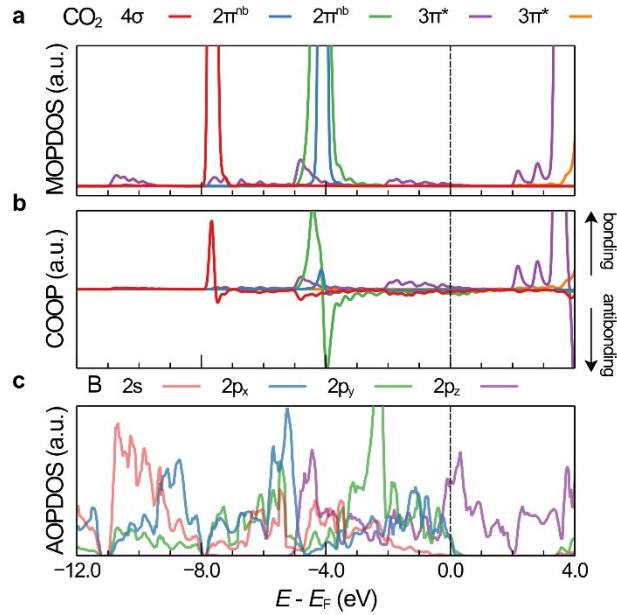

**FIG. S10.** (a) Molecular-orbital projected density of states (MOPDOS) of CO<sub>2</sub> on borophene. (b) Crystal orbital overlap population (COOP) between CO<sub>2</sub> and borophene. (c) Atomic-orbital projected density of states (AOPDOS) of nearest neighbor B atom of CO<sub>2</sub>.

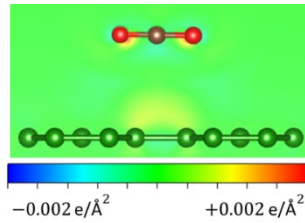

**FIG. S11.** Charge density difference of CO<sub>2</sub> - borophene induced by the adsorption.

## References

- 1 D. Chakraborty, K. Berland and T. Thonhauser, *J. Chem. Theory Comput.*, 2020, **16**, 5893–5911.
- 2 X. Tan, H. A. Tahini and S. C. Smith, *ACS Appl. Mater. Interfaces*, 2017, **9**, 19825–19830.
- 3 C. S. Huang, A. Murat, V. Babar, E. Montes and U. Schwingenschlögl, *J. Phys. Chem. C*, 2018, **122**, 14665–14670.
- 4 K. Takeuchi, S. Yamamoto, Y. Hamamoto, Y. Shiozawa, K. Tashima, H. Fukidome, T. Koitaya, K. Mukai, S. Yoshimoto, M. Suemitsu, Y. Morikawa, J. Yoshinobu and I. Matsuda, *J. Phys. Chem. C*, 2017, **121**, 2807–2814.
- 5 X. Lin, J. Ni and C. Fang, *J. Appl. Phys.*, 2013, **113**, 034306.
- 6 S. Zhao, J. Xue and W. Kang, *Chem. Phys. Lett.*, 2014, **595–596**, 35–42.
- 7 V. Q. Bui, T.-T. Pham, D. A. Le, C. M. Thi and H. M. Le, *J. Phys. Condens. Matter*, 2015, **27**, 305005.
- 8 W. Xia, W. Hu, Z. Li and J. Yang, *Phys. Chem. Chem. Phys.*, 2014, **16**, 22495–22498.
- 9 Y. Cai, Q. Ke, G. Zhang and Y.-W. Zhang, *J. Phys. Chem. C*, 2015, **119**, 3102–3110.
- 10 T. Shimanouchi, *J. Phys. Chem. Ref. Data*, 1977, **6**, 993–1102.
